# Supplementary material for: Applying Intervention Mapping to Improve the Applicability of Precious Memories, an Intervention for Depressive Symptoms in Nursing Home Residents
Source: MDPI journal article supplement (doi:10.3390/ijerph16245163), 2019-12-17
Supplement: s1 [file s1]

**Table S1.** Online questionnaire

| Question                                                                                                                                                                                                                                                                                                                                                                                                                                                                           | Answer options                                                            |
|------------------------------------------------------------------------------------------------------------------------------------------------------------------------------------------------------------------------------------------------------------------------------------------------------------------------------------------------------------------------------------------------------------------------------------------------------------------------------------|---------------------------------------------------------------------------|
| <i>Demographic information</i>                                                                                                                                                                                                                                                                                                                                                                                                                                                     |                                                                           |
| How old are you?                                                                                                                                                                                                                                                                                                                                                                                                                                                                   | Numeric value                                                             |
| What is your gender?                                                                                                                                                                                                                                                                                                                                                                                                                                                               | Female/male                                                               |
| Which education have you received after high school?                                                                                                                                                                                                                                                                                                                                                                                                                               | Open question                                                             |
| <i>Occupational information</i>                                                                                                                                                                                                                                                                                                                                                                                                                                                    |                                                                           |
| Which region do you work in?; What is your current profession?                                                                                                                                                                                                                                                                                                                                                                                                                     | Open question                                                             |
| How much working experience do you have with the target population of PM (in years)?                                                                                                                                                                                                                                                                                                                                                                                               | Numeric value                                                             |
| <i>Reach</i>                                                                                                                                                                                                                                                                                                                                                                                                                                                                       |                                                                           |
| We know that not all residents that might be indicated to receive a treatment actually receive that treatment. If the circumstances were ideal, how many residents do you estimate could have received PM, since you followed the PM training?; To how many residents did you propose PM since you followed the training?; With how many residents did you start PM since you followed the training?; With how many residents did you complete PM since you followed the training? | Numeric value                                                             |
| To which type of residents did you propose/apply PM?                                                                                                                                                                                                                                                                                                                                                                                                                               | Primarily somatic symptoms; cognitive symptoms; other: [own answer].      |
| To which type of complaints did you propose/apply PM?                                                                                                                                                                                                                                                                                                                                                                                                                              | Depressive symptoms; anxiety symptoms; other: [own answer].               |
| <i>Relevance</i>                                                                                                                                                                                                                                                                                                                                                                                                                                                                   |                                                                           |
| To what extent do you think PM can generally help to decrease depression in NH residents?; To what extent do you think PM can generally help to increase well-being in NH residents?; To what extent do you think PM meets the needs of NH residents?; To what extent do you think PM meets                                                                                                                                                                                        | 10-point Likert scale from 1 = <i>not at all</i> to 10 = <i>very much</i> |

the expectations of NH residents? To what extent are you satisfied with PM in general?; How satisfied are you with 'Session 1 - Introduction'?; How satisfied are you with 'Session 2 - Childhood'?; How satisfied are you with 'Session 3 - Adolescence'?; How satisfied are you with 'Session 4 - Adulthood'?; How satisfied are you with 'Session 5 – Closing'?

Would you recommend the use of PM to other professionals?

Yes/No

---

### *Feasibility*

How feasible do you believe the design of PM is?; How feasible do you believe PM is in comparison to other treatments for depression in NH residents?; To what extent do you believe PM is appropriate for your work as a psychologist?; To what extent do you believe the general content of PM is applicable for the target group?; How applicable do you think 'Session 1 - Introduction' is?; How applicable do you think 'Session 2 - Childhood' is?; How applicable do you think 'Session 3 - Adolescence' is?; How applicable do you think 'Session 4 - Adulthood' is?; How applicable do you think 'Session 5 – Closing' is?; How easy do you think it is to execute PM?; To what extent do you feel competent to execute PM?

10-point Likert scale from 1 = *not at all* to 10 = *very much*

---

### *Barriers and facilitators*

Available time; the PM protocol; cooperation with my close colleagues; cooperation with colleagues from other disciplines; my supervisor/manager; changes within my team; changes within the organization; the culture within my organization; the extent to which PM is regarded important in my organization; information about PM from congresses, conferences, articles, etc.; other factors: [own answers].

10-point Likert scale from 1 = *very much obstructed implementation* to 10 = *very much facilitated implementation*

---
