# Supplementary material for: Applying Intervention Mapping to Improve the Applicability of Precious Memories, an Intervention for Depressive Symptoms in Nursing Home Residents
Source: MDPI journal article supplement (doi:10.3390/ijerph16245163), 2019-12-17
Supplement: s1 [file s1]

**Table S3.** Selected theory-based methods and applications addressing the determinants of behavior change

| Determinants                                                                                                                                 | Who | Theory-based method(s)                                                                                                                                        | Application(s)                     | Explanation (parameters)                                                                                                                               |
|----------------------------------------------------------------------------------------------------------------------------------------------|-----|---------------------------------------------------------------------------------------------------------------------------------------------------------------|------------------------------------|--------------------------------------------------------------------------------------------------------------------------------------------------------|
| <b>Attitude (A)</b>                                                                                                                          |     |                                                                                                                                                               |                                    |                                                                                                                                                        |
| A1: The psychologist believes it is important to report the positive memories.                                                               | P   | <b>Arguments</b> [1] to convince the psychologist of the importance of reporting the positive memories.                                                       | PM training                        | Psychologists are informed that reporting the positive memories is necessary to create memory-products ( <b>new information</b> ). (OE1)               |
| A2: The psychologist and main nurse believe it is important to develop a detailed plan to improve positive contact together with the client. | P   | <b>Arguments</b> [1] to convince the psychologist to develop a detailed plan together with the main nurse to improve positive contact with the client.        | PM training                        | Psychologists are informed that developing a detailed plan together with the main nurse increases application of PM ( <b>new information</b> ). (OE2)  |
|                                                                                                                                              | N   | <b>Arguments</b> [1] to convince the main nurse to develop a detailed plan together with the psychologist to improve positive contact with the client.        | <i>AiD training and e-learning</i> | Nurses are informed that developing a detailed plan together with the psychologist increases application of PM ( <b>new information</b> ). (OE2)       |
| A3: The psychologist and main nurse believe it is important to integrate the activity in the pleasant activities plan together.              | P   | <b>Arguments</b> [1] to persuade the psychologist of the importance of integrating the activity in the pleasant activities plan together with the main nurse. | PM training                        | Psychologists are informed that integrating the activity in the pleasant activities plan increases application of PM ( <b>new information</b> ). (OE3) |

|                                                                                                                             |          |                                                                                                                                                                                                                                                 |                                    |                                                                                                                                                                                                                                                                                                                                            |
|-----------------------------------------------------------------------------------------------------------------------------|----------|-------------------------------------------------------------------------------------------------------------------------------------------------------------------------------------------------------------------------------------------------|------------------------------------|--------------------------------------------------------------------------------------------------------------------------------------------------------------------------------------------------------------------------------------------------------------------------------------------------------------------------------------------|
|                                                                                                                             | <i>N</i> | <b>Arguments</b> [1] to persuade the main nurse of the importance of integrating the activity in the pleasant activities plan together with the psychologist.                                                                                   | <i>AiD training and e-learning</i> | Nurses are informed that integrating the activity in the pleasant activities plan increases application of PM ( <b>new information</b> ). (OE3)                                                                                                                                                                                            |
| A4: The psychologist believes it is important to instruct and practice with the supporter.                                  | <i>P</i> | <b>Arguments</b> [1] to convince the psychologist of the importance of instructing and practicing with the supporter.                                                                                                                           | PM training                        | Psychologists are informed that instructing and practicing with the supporter increases quality and application of PM ( <b>new information</b> ). (OE4)                                                                                                                                                                                    |
| A5: The supporter believes it is important to help the client retrieve positive memories.                                   | <i>S</i> | <b>Arguments</b> [1] to persuade the supporter of the importance of helping the client retrieve positive memories. The supporter <b>directly experiences</b> [1] the effect of retrieving positive memories through <b>active learning</b> [1]. | <u>Coaching by psychologist</u>    | Supporters are instructed by the psychologist that retrieving positive memories with the client improves contact ( <b>new information</b> ) and practice multiple questions with the psychologist through role play. Afterwards, supporters are asked how it felt and how it could affect the client ( <b>explaining outcomes</b> ). (OE5) |
| A6: The psychologist and main nurse believe it is important to evaluate (and adjust) the pleasant activities plan together. | <i>P</i> | <b>Arguments</b> [1] to convince the psychologist to evaluate (and adjust) the pleasant activities plan together with the main nurse.                                                                                                           | PM training                        | Psychologists are told that evaluating (and adjusting) the pleasant activities plan improves the quality of the plan and is a requirement to improve client contact ( <b>new information</b> ). (OE6)                                                                                                                                      |
|                                                                                                                             | <i>N</i> | <b>Arguments</b> [1] to convince the main nurse to evaluate (and adjust) the                                                                                                                                                                    | <i>AiD training and e-learning</i> | Nurses are told that evaluating (and adjusting) the pleasant activities plan                                                                                                                                                                                                                                                               |

|                                                                                     |     |                                                                                                                                                                                              |                                                 |                                                                                                                                                                                                                                 |
|-------------------------------------------------------------------------------------|-----|----------------------------------------------------------------------------------------------------------------------------------------------------------------------------------------------|-------------------------------------------------|---------------------------------------------------------------------------------------------------------------------------------------------------------------------------------------------------------------------------------|
|                                                                                     |     | pleasant activities plan together with the psychologist.                                                                                                                                     |                                                 | improves the quality of the plan and is required to improve client contact ( <b>new information</b> ). (OE6)                                                                                                                    |
| A7: The psychologist and main nurse believe implementing PM is part of their tasks. | P/N | <b>Arguments</b> [1] to convince the psychologist and main nurse that implementing PM is part of their tasks. <b>Providing information about approval</b> [1–3] of the management of the NH. | PM training/ <i>AiD training and e-learning</i> | Psychologists and nurses are told that implementation is necessary to execute PM properly ( <b>new information</b> ) and that the management of the NH supports this ( <b>positive expectations</b> ). (OE7)                    |
| Knowledge (K)                                                                       |     |                                                                                                                                                                                              |                                                 |                                                                                                                                                                                                                                 |
| K1a: The psychologist knows why it is important to report the positive memories.    | P   | <b>Providing information</b> [1,2] about the expected outcome of this behavior.                                                                                                              | PM training                                     | The information is provided by the PM trainer.                                                                                                                                                                                  |
| K1b: The psychologist knows how to report the positive memories.                    | P   | <b>Individualized</b> [1] <b>instruction</b> [2,3] by providing a <b>model</b> [1–3] of the desired outcome.                                                                                 | PM training                                     | Psychologists are instructed by the PM trainer ( <b>appropriate model</b> ) on how to report the positive memories and are shown an example of how to report them. Opportunity to ask questions ( <b>responding to needs</b> ). |
| K2a: The psychologist and main nurse know why it is important to develop            | P   | <b>Providing information</b> [1,2] about the expected outcome of this behavior.                                                                                                              | PM training                                     | The information is provided by the PM trainer.                                                                                                                                                                                  |

|                                                                                                                                   |   |                                                                                                                                                                                |                                    |                                                                                                                                                                             |
|-----------------------------------------------------------------------------------------------------------------------------------|---|--------------------------------------------------------------------------------------------------------------------------------------------------------------------------------|------------------------------------|-----------------------------------------------------------------------------------------------------------------------------------------------------------------------------|
| a detailed plan to improve positive contact with the client.                                                                      | N | <b>Providing information</b> [1,2] about the expected outcome of this behavior.                                                                                                | <i>AiD training and e-learning</i> | The information is provided by the AiD trainer and in the e-learning.                                                                                                       |
| K2b: The psychologist and main nurse know how to develop a detailed plan to improve positive contact with the client.             | P | <b>Individualized</b> [1] <b>instruction</b> [2,3] on how to construct a plan with the necessary components through <b>active learning</b> [1] and <b>demonstration</b> [1–3]. | PM training                        | Psychologists are instructed by the PM trainer ( <b>appropriate model</b> ), who demonstrates an example plan. Opportunity to ask questions ( <b>responding to needs</b> ). |
|                                                                                                                                   | N | <b>Individualized</b> [1] <b>instruction</b> [2,3] on how to construct a plan with the necessary components through <b>active learning</b> [1] and <b>demonstration</b> [1–3]. | <i>AiD training and e-learning</i> | Nurses are instructed by the AiD trainer ( <b>appropriate model</b> ), who demonstrates an example plan. Opportunity to ask questions ( <b>responding to needs</b> ).       |
| K3a: The psychologist and main nurse know why it is important to integrate the activity in the pleasant activities plan together. | P | <b>Providing information</b> [1,2] about the expected outcome of this behavior.                                                                                                | PM training                        | The information is provided by the PM trainer.                                                                                                                              |
|                                                                                                                                   | N | <b>Providing information</b> [1,2] about the expected outcome of this behavior.                                                                                                | <i>AiD training and e-learning</i> | The information is provided by the AiD trainer and in the e-learning.                                                                                                       |
| K3b: The psychologist and main nurse know how to integrate the                                                                    | P | <b>Individualized</b> [1] <b>instruction</b> [2,3] and <b>demonstration</b> [1–3] of an example plan.                                                                          | PM training                        | Demonstration and instruction by the PM trainer ( <b>appropriate model</b> ); opportunity to ask questions ( <b>responding to needs</b> ).                                  |

|                                                                                              |          |                                                                                                                                                                               |                                 |                                                                                                                                                                                            |
|----------------------------------------------------------------------------------------------|----------|-------------------------------------------------------------------------------------------------------------------------------------------------------------------------------|---------------------------------|--------------------------------------------------------------------------------------------------------------------------------------------------------------------------------------------|
| activity in the pleasant activities plan together.                                           | <i>N</i> | <b>Individualized [1] instruction [2,3]</b> and <b>demonstration [1–3]</b> of an example plan.                                                                                | <i>AiD training</i>             | Demonstration and instruction by the AiD trainer ( <b>appropriate model</b> ); opportunity to ask questions ( <b>responding to needs</b> ).                                                |
| K4a: The psychologist knows why it is important to instruct and practice with the supporter. | <i>P</i> | <b>Providing information [1,2]</b> about the expected outcome of this behavior.                                                                                               | PM training                     | The information is provided by the PM trainer.                                                                                                                                             |
| K4b: The psychologist knows how to instruct and practice with the supporter.                 | <i>P</i> | <b>Individualized [1] instruction [2,3]</b> on how psychologists could practice with the supporter by providing a <b>demonstration [1–3]</b> .                                | PM training                     | Psychologists are instructed by the PM trainer, who models the behavior ( <b>appropriate model</b> ). Opportunity to ask questions ( <b>responding to needs</b> ).                         |
| K5a: The supporter knows why it is important to help the client retrieve positive memories.  | <i>S</i> | <b>Providing information [1,2]</b> about the expected outcome of this behavior.                                                                                               | <u>Coaching by psychologist</u> | The information is provided by the psychologist.                                                                                                                                           |
| K5b: The supporter knows how to help the client retrieve positive memories.                  | <i>S</i> | <b>Individualized [1] instruction [2,3]</b> on how to help the client retrieve positive memories are provided by the psychologist, who also <b>models [1–3]</b> the behavior. | <u>Coaching by psychologist</u> | Psychologists ( <b>appropriate model</b> ) instruct the supporters and show the appropriate behavior through role play. Opportunity to ask questions ( <b>responding to their needs</b> ). |
| K6a: The psychologist and main nurse know why                                                | <i>P</i> | <b>Providing information [2]</b> about the expected outcome of this behavior.                                                                                                 | PM training                     | The information is provided by the PM trainer.                                                                                                                                             |

|                                                                                                               |            |                                                                                                                                                        |                                                 |                                                                                                                                                                                                                 |
|---------------------------------------------------------------------------------------------------------------|------------|--------------------------------------------------------------------------------------------------------------------------------------------------------|-------------------------------------------------|-----------------------------------------------------------------------------------------------------------------------------------------------------------------------------------------------------------------|
| it is important to evaluate (and adjust) the pleasant activities plan together.                               | <i>N</i>   | <b>Providing information</b> [1,2] about the expected outcome of this behavior.                                                                        | <i>AiD training and e-learning</i>              | The information is provided by the AiD trainer and in the e-learning.                                                                                                                                           |
| K6b: The psychologist and main nurse know how to evaluate (and adjust) the pleasant activities plan together. | <i>P</i>   | <b>Individualized</b> [1] <b>instruction</b> [2,3] and <b>demonstration</b> [1–3] of an evaluation.                                                    | PM training                                     | Instruction and demonstration by the PM trainer ( <b>appropriate model</b> ); opportunity to ask questions ( <b>responding to needs</b> ).                                                                      |
|                                                                                                               | <i>N</i>   | <b>Individualized</b> [1] <b>instruction</b> [2,3] and <b>demonstration</b> [1–3] of an evaluation.                                                    | <i>AiD training</i>                             | Instruction and demonstration by the AiD trainer ( <b>appropriate model</b> ); opportunity to ask questions ( <b>responding to needs</b> ).                                                                     |
| K7a: The psychologist and main nurse know why it is important to implement PM.                                | <i>P/N</i> | <b>Providing information</b> [2] about the expected outcome of this behavior.                                                                          | PM training/ <i>AiD training and e-learning</i> | The information is provided by the PM/AiD trainer and in the e-learning.                                                                                                                                        |
| K7b: The psychologist and main nurse how to implement PM.                                                     | <i>P/N</i> | <b>Individualized</b> [1] <b>instruction</b> [2,3] on how to implement PM.                                                                             | PM training/ <i>AiD training and e-learning</i> | Instruction by the PM/AiD trainer and in the e-learning ( <b>appropriate model</b> ). Opportunity to ask questions ( <b>responding to needs</b> ).                                                              |
| Self-efficacy (SE)                                                                                            |            |                                                                                                                                                        |                                                 |                                                                                                                                                                                                                 |
| SE1: The psychologist feels capable to report the positive memories.                                          | <i>P</i>   | Psychologists are <b>verbally persuaded</b> [1,3] about their capabilities.<br><b>Guided practice</b> [1,2] with <b>feedback on performance</b> [2,3]. | PM training                                     | Psychologists are persuaded by the PM trainer ( <b>credible source</b> ) why they are capable to report the memories. They practice and receive feedback on performance ( <b>specific and individual</b> ) from |

|                                                                                                                           |   |                                                                                                                                                                                                            |                                                              |                                                                                                                                                                                                                                                                                                                                    |
|---------------------------------------------------------------------------------------------------------------------------|---|------------------------------------------------------------------------------------------------------------------------------------------------------------------------------------------------------------|--------------------------------------------------------------|------------------------------------------------------------------------------------------------------------------------------------------------------------------------------------------------------------------------------------------------------------------------------------------------------------------------------------|
|                                                                                                                           |   |                                                                                                                                                                                                            |                                                              | the PM trainer ( <b>experienced person</b> ) in the second PM training session.                                                                                                                                                                                                                                                    |
| SE2: The psychologist and main nurse feel capable to develop a detailed plan to improve positive contact with the client. | P | Psychologists are <b>verbally persuaded</b> [1,3] about their capabilities to develop a detailed plan together with nursing staff. <b>Guided practice</b> [1,2] with <b>feedback on performance</b> [2,3]. | PM training                                                  | Psychologists are persuaded by the PM trainer ( <b>credible source</b> ) why they are capable to develop a detailed plan. They practice and receive feedback on performance ( <b>specific and individual</b> ) from the PM trainer ( <b>experienced person</b> ) in the second PM training session.                                |
|                                                                                                                           | N | Main nurses are <b>verbally persuaded</b> [1,3] about their capabilities to develop a detailed plan together with psychologists. <b>Guided practice</b> [1,2] with <b>feedback on performance</b> [2,3].   | <i>AiD training, e-learning and coaching by psychologist</i> | Nurses are persuaded by the AiD trainer and in the e-learning ( <b>credible sources</b> ) why they are capable to develop a detailed plan. They practice and receive feedback on performance ( <b>specific and individual</b> ) by the psychologist through coaching.                                                              |
| SE3: The psychologist and main nurse feel capable to integrate the activity in the pleasant activities plan together.     | P | Psychologists are <b>verbally persuaded</b> [1,3] about their capabilities. <b>Guided practice</b> [1,2] with <b>feedback on performance</b> [2,3].                                                        | PM training                                                  | Psychologists are persuaded by the PM trainer ( <b>credible source</b> ) why they are capable to integrate the activity in the pleasant activities plan. They practice and receive feedback on performance ( <b>specific and individual</b> ) from the PM trainer ( <b>experienced person</b> ) in the second PM training session. |

|                                                                                            |          |                                                                                                                                                                                                                                                                |                                                              |                                                                                                                                                                                                                                                                                                                                               |
|--------------------------------------------------------------------------------------------|----------|----------------------------------------------------------------------------------------------------------------------------------------------------------------------------------------------------------------------------------------------------------------|--------------------------------------------------------------|-----------------------------------------------------------------------------------------------------------------------------------------------------------------------------------------------------------------------------------------------------------------------------------------------------------------------------------------------|
|                                                                                            | <i>N</i> | Main nurses are <b>verbally persuaded</b> [1,3] about their capabilities. <b>Guided practice</b> [1,2] with <b>feedback on performance</b> [2,3].                                                                                                              | <i>AiD training, e-learning and coaching by psychologist</i> | Nurses are persuaded by the AiD trainer and in the e-learning ( <b>credible sources</b> ) why they are capable to integrate the activity in the pleasant activities plan. They practice and receive feedback on performance ( <b>specific and individual</b> ) by the psychologist through coaching.                                          |
| SE4: The psychologist feels capable to instruct and practice with the supporter.           | <i>P</i> | Psychologists are <b>verbally persuaded</b> [1,3] about their capabilities.                                                                                                                                                                                    | PM training                                                  | Psychologists are persuaded by the PM trainer ( <b>credible source</b> ) why they are capable to instruct and practice with the supporter.                                                                                                                                                                                                    |
| SE5: The supporter feels capable to help the client retrieve positive memories.            | <i>S</i> | The supporter is <b>verbally persuaded</b> [1,3] about his/her capabilities, which are further strengthened by <b>guided practice</b> [1,2] with the psychologist and <b>feedback on performance</b> [2,3]. The supporter <b>plans coping responses</b> [1–3]. | <u>Coaching by psychologist</u>                              | Supporters are persuaded by the psychologist ( <b>credible source</b> ) and practice with the psychologist through role play and receive feedback ( <b>specific and individual</b> ) from the psychologist ( <b>experienced person</b> ). Supporters learn to deal with potential problems ( <b>identification of high-risk situations</b> ). |
| SE6: The psychologist and main nurse believe they are capable to evaluate (and adjust) the | <i>P</i> | Psychologists are <b>verbally persuaded</b> [1,3] about their capabilities. <b>Guided practice</b> [1,2] with <b>feedback on performance</b> [2,3].                                                                                                            | PM training                                                  | Psychologists are persuaded by the PM trainer ( <b>credible source</b> ) how they are capable to evaluate (and adjust) the pleasant activities plan. They practice and receive                                                                                                                                                                |



|                                                                    |            |                                                                                                                                                   |                                                              |                                                                                                                                                                                                                                                                                                  |
|--------------------------------------------------------------------|------------|---------------------------------------------------------------------------------------------------------------------------------------------------|--------------------------------------------------------------|--------------------------------------------------------------------------------------------------------------------------------------------------------------------------------------------------------------------------------------------------------------------------------------------------|
| pleasant activities plan together.                                 |            |                                                                                                                                                   |                                                              | feedback ( <b>specific and individual</b> ) from the PM trainer ( <b>experienced person</b> ) in the second PM session.                                                                                                                                                                          |
|                                                                    | <i>N</i>   | Main nurses are <b>verbally persuaded</b> [1,3] about their capabilities. <b>Guided practice</b> [1,2] with <b>feedback on performance</b> [2,3]. | <i>AiD training, e-learning and coaching by psychologist</i> | Nurses are persuaded by the AiD trainer and in the e-learning ( <b>credible sources</b> ) why they are capable to evaluate (and adjust) the pleasant activities plan. They practice and receive feedback on performance ( <b>specific and individual</b> ) by the psychologist through coaching. |
| SE7: The psychologist and main nurse feel capable to implement PM. | <i>P/N</i> | Psychologists and main nurses are <b>verbally persuaded</b> [1,3] about their capabilities.                                                       | PM training/ <i>AiD training and e-learning</i>              | Psychologists and nurses are told by the PM trainer/AiD trainer and in the e-learning ( <b>credible source</b> ) why they are capable to implement PM.                                                                                                                                           |

AiD = Act in case of Depression; P = Psychologist; N = Main nurse; S = Supporter of PM, helps the client retrieve positive memories.

## References

1. Kok, G.; Gottlieb, N.H.; Peters, G.J.Y.; Mullen, P.D.; Parcel, G.S.; Ruiter, R.A.C.; Fernández, M.E.; Markham, C.; Bartholomew, L.K. A taxonomy of behaviour change methods: An Intervention Mapping approach. *Health Psychol. Rev.* **2016**, *10*, 297–312.
2. Abraham, C.; Michie, S. A taxonomy of behavior change techniques used in interventions. *Health Psychol.* **2008**, *27*, 379–387.
3. Michie, S.; Wood, C.E.; Johnston, M.; Abraham, C.; Francis, J.J.; Hardeman, W. Behaviour change techniques: The development and evaluation of a taxonomic method for reporting and describing behaviour change interventions (a suite of five studies involving consensus methods, randomised controlled trials and analysis of qualitative data). *Health Technol. Assess.* **2015**, *19*, 1–187.
