# Supplementary figures and images for: Applying Intervention Mapping to Improve the Applicability of Precious Memories, an Intervention for Depressive Symptoms in Nursing Home Residents
Source: MDPI journal article supplement (doi:10.3390/ijerph16245163), 2019-12-17

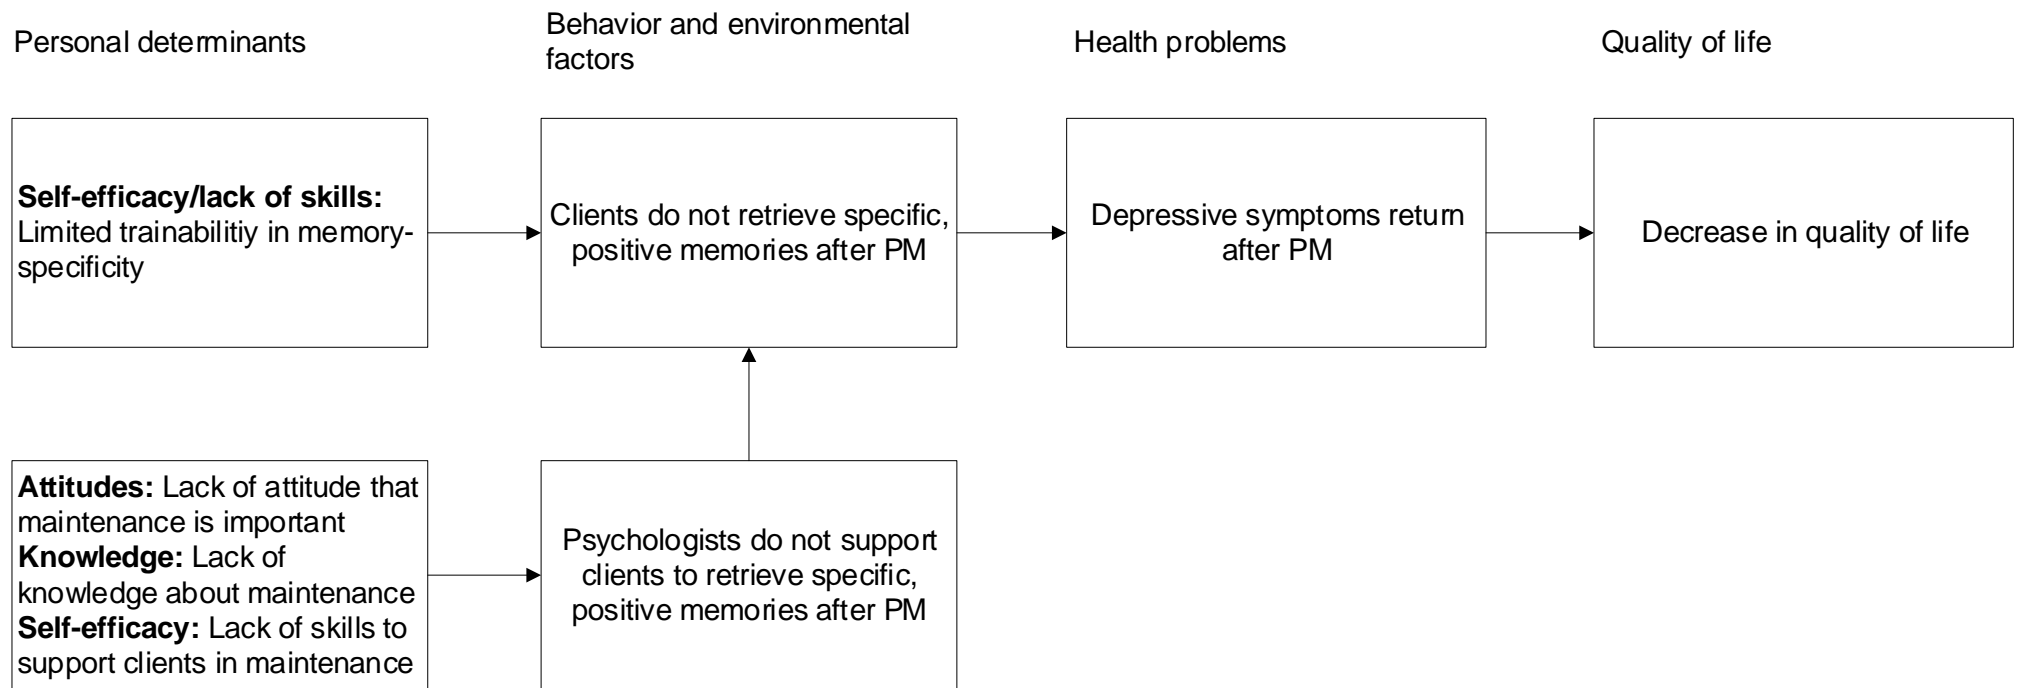

**Figure S1.** Logic model of the problem

Supplement: s1 [file s1]
